# Supplementary material
Source: publisher figshare collection journal article supplement (https://acs.figshare.com/ndownloader/files/4768255)
Supplement: Supplementary file 1 [file 4768255]

# 
#  This .CIF file is to accompany the MS to be submitted to J.A.C.S
# 
#  "Aryl trihydroxyboronates: easily isolated discrete species convenient for 
#   direct application in coupling reactions"
#
#   by A.N. Cammidge, H. Gopee, N.L. Harrison, D.L. Hughes, C.J. Schubert
#      B.M. Sutton, G.L. Watts and A.J. Whitehead
#
 
data_chriss1 
 
_audit_creation_method            SHELXL-97 
_chemical_name_systematic 
; 
 ? 
; 
_chemical_name_common             ? 
_chemical_melting_point           ? 
_chemical_formula_moiety          'C7 H10 B O4, Na H10 O5' 
_chemical_formula_structural      '[Na (H2O)5]n.n(p-MeOC6H4B(OH)3)'
_chemical_formula_sum             'C7 H20 B Na O9' 
_chemical_formula_weight          282.03 
 
loop_ 
 _atom_type_symbol 
 _atom_type_description 
 _atom_type_scat_dispersion_real 
 _atom_type_scat_dispersion_imag 
 _atom_type_scat_source 
 'C'  'C'   0.0033   0.0016 
 'International Tables Vol C Tables 4.2.6.8 and 6.1.1.4' 
 'H'  'H'   0.0000   0.0000 
 'International Tables Vol C Tables 4.2.6.8 and 6.1.1.4' 
 'B'  'B'   0.0013   0.0007 
 'International Tables Vol C Tables 4.2.6.8 and 6.1.1.4' 
 'Na'  'Na'   0.0362   0.0249 
 'International Tables Vol C Tables 4.2.6.8 and 6.1.1.4' 
 'O'  'O'   0.0106   0.0060 
 'International Tables Vol C Tables 4.2.6.8 and 6.1.1.4' 
 
_symmetry_cell_setting            orthorhombic
_symmetry_space_group_name_H-M    'P 212121  (no. 19)'
 
loop_ 
 _symmetry_equiv_pos_as_xyz 
 'x, y, z' 
 '-x+1/2, -y, z+1/2' 
 'x+1/2, -y+1/2, -z' 
 '-x, y+1/2, -z+1/2' 
 
_cell_length_a                    6.126(2) 
_cell_length_b                    7.3524(13) 
_cell_length_c                    29.508(5) 
_cell_angle_alpha                 90.00 
_cell_angle_beta                  90.00 
_cell_angle_gamma                 90.00 
_cell_volume                      1329.1(6) 
_cell_formula_units_Z             4 
_cell_measurement_temperature     293(2) 
_cell_measurement_reflns_used     25
_cell_measurement_theta_min       7.6
_cell_measurement_theta_max       9.6
 
_exptl_crystal_description        block
_exptl_crystal_colour             colourless
_exptl_crystal_size_max           0.43
_exptl_crystal_size_mid           0.29
_exptl_crystal_size_min           0.21
_exptl_crystal_density_meas       ? 
_exptl_crystal_density_diffrn     1.409 
_exptl_crystal_density_method     'not measured' 
_exptl_crystal_F_000              600 
_exptl_absorpt_coefficient_mu     0.153 
_exptl_absorpt_correction_type    'none applied'
_exptl_absorpt_correction_T_min   ?
_exptl_absorpt_correction_T_max   ?  
_exptl_absorpt_process_details    ?
 
_exptl_special_details 
; 
 ? 
; 
 
_diffrn_ambient_temperature       293(2) 
_diffrn_radiation_wavelength      0.71069 
_diffrn_radiation_type            Mo-K\a 
_diffrn_radiation_source          'fine-focus sealed tube' 
_diffrn_radiation_monochromator   graphite 
_diffrn_measurement_device        'Enraf-Nonius CAD4 diffractometer'
_diffrn_measurement_method        'scintillation counter; \w/\q scans'
_diffrn_standards_number          3 
_diffrn_standards_interval_count  ? 
_diffrn_standards_interval_time   '10000 s'
_diffrn_standards_decay_%         6.1 
_diffrn_reflns_number             1786 
_diffrn_reflns_av_R_equivalents   0.0275 
_diffrn_reflns_av_sigmaI/netI     0.0449 
_diffrn_reflns_limit_h_min        -1 
_diffrn_reflns_limit_h_max        7 
_diffrn_reflns_limit_k_min        -1 
_diffrn_reflns_limit_k_max        8 
_diffrn_reflns_limit_l_min        -1 
_diffrn_reflns_limit_l_max        34 
_diffrn_reflns_theta_min          2.76 
_diffrn_reflns_theta_max          24.96 
_reflns_number_total              1786 
_reflns_number_gt                 1536 
_reflns_threshold_expression      I>2sigma(I) 
 
_computing_data_collection        'CAD4/EXPRESS (Enraf-Nonius, 1992)'
_computing_cell_refinement        'CAD4/EXPRESS (Enraf-Nonius, 1992)'
_computing_data_reduction         'CAD4 (Hursthouse, 1976)'
_computing_structure_solution     'SHELXS-97 (Sheldrick, 1997)' 
_computing_structure_refinement   'SHELXL-97 (Sheldrick, 1997)' 
_computing_molecular_graphics     'ORTEP (Johnson, 1971)'
_computing_publication_material   'SHELXL-97 (Sheldrick, 1997)' 
 
_refine_special_details 
; 
 Refinement of F^2^ against ALL reflections.  The weighted R-factor wR and 
 goodness of fit S are based on F^2^, conventional R-factors R are based 
 on F, with F set to zero for negative F^2^. The threshold expression of 
 F^2^ > 2sigma(F^2^) is used only for calculating R-factors(gt) etc. and is 
 not relevant to the choice of reflections for refinement.  R-factors based 
 on F^2^ are statistically about twice as large as those based on F, and R- 
 factors based on ALL data will be even larger. 
; 
 
_refine_ls_structure_factor_coef  Fsqd  
_refine_ls_matrix_type            full 
_refine_ls_weighting_scheme       calc  
_refine_ls_weighting_details 
 'calc w=1/[\s^2^(Fo^2^)+(0.0421P)^2^+0.0474P] where P=(Fo^2^+2Fc^2^)/3' 
_atom_sites_solution_primary      direct 
_atom_sites_solution_secondary    difmap 
_atom_sites_solution_hydrogens    geom 
_refine_ls_hydrogen_treatment     mixed 
_refine_ls_extinction_method      none 
_refine_ls_extinction_coef        ? 
_refine_ls_abs_structure_details 
 'Flack H D (1983), Acta Cryst. A39, 876-881' 
_refine_ls_abs_structure_Flack    -0.3(6) 
_refine_ls_number_reflns          1786 
_refine_ls_number_parameters      216 
_refine_ls_number_restraints      0 
_refine_ls_R_factor_all           0.0420 
_refine_ls_R_factor_gt            0.0351 
_refine_ls_wR_factor_ref          0.0846 
_refine_ls_wR_factor_gt           0.0802 
_refine_ls_goodness_of_fit_ref    1.086 
_refine_ls_restrained_S_all       1.086 
_refine_ls_shift/su_max           0.001 
_refine_ls_shift/su_mean          0.000 
 
loop_ 
 _atom_site_label 
 _atom_site_type_symbol 
 _atom_site_fract_x 
 _atom_site_fract_y 
 _atom_site_fract_z 
 _atom_site_U_iso_or_equiv 
 _atom_site_adp_type 
 _atom_site_occupancy 
 _atom_site_symmetry_multiplicity 
 _atom_site_calc_flag 
 _atom_site_refinement_flags 
 _atom_site_disorder_assembly 
 _atom_site_disorder_group 
Na Na 0.78603(18) 0.89880(14) 0.04432(3) 0.0334(3) Uani 1 1 d . . . 
C1 C 0.3835(4) 0.3851(3) 0.17261(7) 0.0213(5) Uani 1 1 d . . . 
C2 C 0.1958(4) 0.2896(3) 0.18474(8) 0.0241(6) Uani 1 1 d . . . 
H2 H 0.1263 0.2201 0.1627 0.029 Uiso 1 1 calc R . . 
C3 C 0.1070(5) 0.2930(4) 0.22837(8) 0.0267(6) Uani 1 1 d . . . 
H3 H -0.0204 0.2295 0.2350 0.032 Uiso 1 1 calc R . . 
C4 C 0.2124(4) 0.3923(4) 0.26138(7) 0.0247(5) Uani 1 1 d . . . 
C5 C 0.3989(5) 0.4901(4) 0.25129(8) 0.0265(6) Uani 1 1 d . . . 
H5 H 0.4687 0.5581 0.2736 0.032 Uiso 1 1 calc R . . 
C6 C 0.4801(5) 0.4854(4) 0.20745(8) 0.0272(6) Uani 1 1 d . . . 
H6 H 0.6051 0.5523 0.2009 0.033 Uiso 1 1 calc R . . 
O4 O 0.1419(3) 0.4030(3) 0.30604(5) 0.0320(5) Uani 1 1 d . . . 
C41 C -0.0588(5) 0.3126(4) 0.31698(9) 0.0400(7) Uani 1 1 d . . . 
H41A H -0.1729 0.3568 0.2976 0.060 Uiso 1 1 calc R . . 
H41B H -0.0961 0.3367 0.3480 0.060 Uiso 1 1 calc R . . 
H41C H -0.0417 0.1840 0.3127 0.060 Uiso 1 1 calc R . . 
B1 B 0.4808(5) 0.3845(4) 0.12115(9) 0.0233(6) Uani 1 1 d . . . 
O11 O 0.7243(3) 0.3834(3) 0.12196(6) 0.0319(5) Uani 1 1 d . . . 
H11 H 0.770(6) 0.357(4) 0.1461(10) 0.047(10) Uiso 1 1 d . . . 
O12 O 0.4012(3) 0.2254(3) 0.09482(6) 0.0273(4) Uani 1 1 d . . . 
H12 H 0.437(5) 0.133(4) 0.1054(8) 0.024(8) Uiso 1 1 d . . . 
O13 O 0.4234(4) 0.5492(3) 0.09548(6) 0.0275(5) Uani 1 1 d . . . 
H13 H 0.305(6) 0.557(4) 0.0925(9) 0.024(9) Uiso 1 1 d . . . 
O21 O 0.5843(4) 0.8856(3) 0.11536(7) 0.0350(5) Uani 1 1 d . . . 
H21A H 0.654(6) 0.892(5) 0.1381(12) 0.049(10) Uiso 1 1 d . . . 
H21B H 0.535(7) 0.785(5) 0.1134(12) 0.054(12) Uiso 1 1 d . . . 
O22 O 0.9836(4) 0.6318(3) 0.07439(7) 0.0352(5) Uani 1 1 d . . . 
H22A H 0.996(8) 0.573(6) 0.0430(16) 0.102(15) Uiso 1 1 d . . . 
H22B H 0.919(6) 0.572(4) 0.0871(11) 0.034(11) Uiso 1 1 d . . . 
O23 O 0.9746(4) 1.1660(3) 0.06609(7) 0.0356(5) Uani 1 1 d . . . 
H23A H 1.094(7) 1.181(4) 0.0745(10) 0.032(9) Uiso 1 1 d . . . 
H23B H 0.895(7) 1.227(5) 0.0814(11) 0.044(11) Uiso 1 1 d . . . 
O24 O 0.4860(4) 1.0975(3) 0.00966(8) 0.0409(6) Uani 1 1 d . . . 
H24A H 0.462(7) 1.157(5) 0.0295(11) 0.049(12) Uiso 1 1 d . . . 
H24B H 0.491(6) 1.176(5) -0.0103(13) 0.049(11) Uiso 1 1 d . . . 
O25 O 0.5724(4) 0.6325(3) 0.01113(7) 0.0360(5) Uani 1 1 d . . . 
H25A H 0.684(7) 0.564(5) 0.0006(11) 0.056(11) Uiso 1 1 d . . . 
H25B H 0.535(7) 0.592(5) 0.0341(12) 0.061(13) Uiso 1 1 d . . . 
 
loop_ 
 _atom_site_aniso_label 
 _atom_site_aniso_U_11 
 _atom_site_aniso_U_22 
 _atom_site_aniso_U_33 
 _atom_site_aniso_U_23 
 _atom_site_aniso_U_13 
 _atom_site_aniso_U_12 
Na 0.0355(6) 0.0347(5) 0.0299(5) -0.0001(5) 0.0021(5) -0.0016(6) 
C1 0.0235(12) 0.0202(11) 0.0202(10) -0.0005(11) -0.0005(10) 0.0039(13) 
C2 0.0240(13) 0.0260(12) 0.0223(11) -0.0015(11) -0.0050(11) -0.0018(13) 
C3 0.0245(14) 0.0299(13) 0.0257(12) 0.0019(12) 0.0016(12) -0.0071(14) 
C4 0.0281(13) 0.0286(12) 0.0174(11) 0.0029(11) 0.0023(10) 0.0045(15) 
C5 0.0273(14) 0.0293(13) 0.0231(12) -0.0047(12) -0.0019(12) -0.0041(14) 
C6 0.0230(14) 0.0294(14) 0.0293(13) -0.0023(12) 0.0028(12) -0.0053(13) 
O4 0.0344(10) 0.0437(11) 0.0179(8) -0.0001(9) 0.0036(8) -0.0027(11) 
C41 0.0390(17) 0.0524(17) 0.0287(13) 0.0066(14) 0.0088(13) -0.0053(17) 
B1 0.0210(14) 0.0282(15) 0.0206(12) 0.0014(14) 0.0014(12) -0.0013(16) 
O11 0.0223(9) 0.0477(11) 0.0258(9) 0.0009(11) -0.0003(8) 0.0052(11) 
O12 0.0335(11) 0.0267(10) 0.0217(8) -0.0009(8) -0.0031(9) 0.0032(10) 
O13 0.0232(11) 0.0307(11) 0.0285(9) 0.0069(8) -0.0003(9) 0.0015(9) 
O21 0.0425(12) 0.0305(11) 0.0320(11) 0.0002(11) -0.0051(10) -0.0020(12) 
O22 0.0322(11) 0.0421(13) 0.0314(11) 0.0030(10) 0.0015(10) -0.0006(12) 
O23 0.0286(12) 0.0400(12) 0.0383(12) -0.0104(10) -0.0007(11) -0.0005(11) 
O24 0.0611(15) 0.0358(12) 0.0260(10) -0.0061(11) 0.0028(11) 0.0037(13) 
O25 0.0412(13) 0.0416(13) 0.0253(10) 0.0010(10) -0.0008(10) 0.0004(12) 
 
_geom_special_details 
; 
 All esds (except the esd in the dihedral angle between two l.s. planes) 
 are estimated using the full covariance matrix.  The cell esds are taken 
 into account individually in the estimation of esds in distances, angles 
 and torsion angles; correlations between esds in cell parameters are only 
 used when they are defined by crystal symmetry.  An approximate (isotropic) 
 treatment of cell esds is used for estimating esds involving l.s. planes. 
; 
 
loop_ 
 _geom_bond_atom_site_label_1 
 _geom_bond_atom_site_label_2 
 _geom_bond_distance 
 _geom_bond_site_symmetry_2 
 _geom_bond_publ_flag 
Na O23 2.368(2) . ? 
Na O25 2.410(2) 3_565 ? 
Na O21 2.435(2) . ? 
Na O22 2.471(2) . ? 
Na O25 2.550(2) . ? 
Na O24 2.561(3) . ? 
C1 C2 1.394(4) . ? 
C1 C6 1.397(3) . ? 
C1 B1 1.631(3) . ? 
C2 C3 1.398(3) . ? 
C2 H2 0.9300 . ? 
C3 C4 1.378(3) . ? 
C3 H3 0.9300 . ? 
C4 C5 1.382(4) . ? 
C4 O4 1.389(3) . ? 
C5 C6 1.387(3) . ? 
C5 H5 0.9300 . ? 
C6 H6 0.9300 . ? 
O4 C41 1.434(4) . ? 
C41 H41A 0.9600 . ? 
C41 H41B 0.9600 . ? 
C41 H41C 0.9600 . ? 
B1 O13 1.471(4) . ? 
B1 O12 1.486(4) . ? 
B1 O11 1.492(3) . ? 
O11 H11 0.79(3) . ? 
O12 H12 0.78(3) . ? 
O13 H13 0.73(3) . ? 
O21 H21A 0.79(4) . ? 
O21 H21B 0.80(4) . ? 
O22 H22A 1.02(5) . ? 
O22 H22B 0.70(3) . ? 
O23 H23A 0.78(4) . ? 
O23 H23B 0.80(4) . ? 
O24 H24A 0.74(4) . ? 
O24 H24B 0.82(4) . ? 
O25 Na 2.410(2) 3_465 ? 
O25 H25A 0.90(4) . ? 
O25 H25B 0.78(4) . ? 
 
loop_ 
 _geom_angle_atom_site_label_1 
 _geom_angle_atom_site_label_2 
 _geom_angle_atom_site_label_3 
 _geom_angle 
 _geom_angle_site_symmetry_1 
 _geom_angle_site_symmetry_3 
 _geom_angle_publ_flag 
O23 Na O25 84.75(9) . 3_565 ? 
O23 Na O21 92.70(9) . . ? 
O25 Na O21 161.80(9) 3_565 . ? 
O23 Na O22 108.83(9) . . ? 
O25 Na O22 79.12(8) 3_565 . ? 
O21 Na O22 84.71(8) . . ? 
O23 Na O25 172.47(8) . . ? 
O25 Na O25 92.26(5) 3_565 . ? 
O21 Na O25 92.27(9) . . ? 
O22 Na O25 77.26(8) . . ? 
O23 Na O24 89.13(9) . . ? 
O25 Na O24 107.81(9) 3_565 . ? 
O21 Na O24 90.13(9) . . ? 
O22 Na O24 161.48(9) . . ? 
O25 Na O24 85.20(8) . . ? 
C2 C1 C6 115.2(2) . . ? 
C2 C1 B1 122.6(2) . . ? 
C6 C1 B1 122.1(2) . . ? 
C1 C2 C3 123.3(2) . . ? 
C1 C2 H2 118.4 . . ? 
C3 C2 H2 118.4 . . ? 
C4 C3 C2 118.6(2) . . ? 
C4 C3 H3 120.7 . . ? 
C2 C3 H3 120.7 . . ? 
C3 C4 C5 120.7(2) . . ? 
C3 C4 O4 123.7(2) . . ? 
C5 C4 O4 115.6(2) . . ? 
C4 C5 C6 119.0(2) . . ? 
C4 C5 H5 120.5 . . ? 
C6 C5 H5 120.5 . . ? 
C5 C6 C1 123.2(3) . . ? 
C5 C6 H6 118.4 . . ? 
C1 C6 H6 118.4 . . ? 
C4 O4 C41 117.0(2) . . ? 
O4 C41 H41A 109.5 . . ? 
O4 C41 H41B 109.5 . . ? 
H41A C41 H41B 109.5 . . ? 
O4 C41 H41C 109.5 . . ? 
H41A C41 H41C 109.5 . . ? 
H41B C41 H41C 109.5 . . ? 
O13 B1 O12 107.5(2) . . ? 
O13 B1 O11 104.6(2) . . ? 
O12 B1 O11 109.4(2) . . ? 
O13 B1 C1 112.9(2) . . ? 
O12 B1 C1 111.7(2) . . ? 
O11 B1 C1 110.5(2) . . ? 
B1 O11 H11 112(3) . . ? 
B1 O12 H12 113(2) . . ? 
B1 O13 H13 111(2) . . ? 
Na O21 H21A 117(3) . . ? 
Na O21 H21B 100(3) . . ? 
H21A O21 H21B 109(4) . . ? 
Na O22 H22A 93(2) . . ? 
Na O22 H22B 114(3) . . ? 
H22A O22 H22B 105(4) . . ? 
Na O23 H23A 131(2) . . ? 
Na O23 H23B 109(3) . . ? 
H23A O23 H23B 108(3) . . ? 
Na O24 H24A 99(3) . . ? 
Na O24 H24B 131(3) . . ? 
H24A O24 H24B 99(3) . . ? 
Na O25 Na 135.04(9) 3_465 . ? 
Na O25 H25A 105(2) 3_465 . ? 
Na O25 H25A 100(2) . . ? 
Na O25 H25B 110(3) 3_465 . ? 
Na O25 H25B 97(3) . . ? 
H25A O25 H25B 108(3) . . ? 
 
loop_ 
 _geom_torsion_atom_site_label_1 
 _geom_torsion_atom_site_label_2 
 _geom_torsion_atom_site_label_3 
 _geom_torsion_atom_site_label_4 
 _geom_torsion 
 _geom_torsion_site_symmetry_1 
 _geom_torsion_site_symmetry_2 
 _geom_torsion_site_symmetry_3 
 _geom_torsion_site_symmetry_4 
 _geom_torsion_publ_flag 
C6 C1 C2 C3 0.4(4) . . . . ? 
B1 C1 C2 C3 -178.1(3) . . . . ? 
C1 C2 C3 C4 -1.5(4) . . . . ? 
C2 C3 C4 C5 1.6(4) . . . . ? 
C2 C3 C4 O4 -178.8(2) . . . . ? 
C3 C4 C5 C6 -0.7(4) . . . . ? 
O4 C4 C5 C6 179.7(2) . . . . ? 
C4 C5 C6 C1 -0.4(4) . . . . ? 
C2 C1 C6 C5 0.5(4) . . . . ? 
B1 C1 C6 C5 179.1(3) . . . . ? 
C3 C4 O4 C41 -3.5(4) . . . . ? 
C5 C4 O4 C41 176.1(2) . . . . ? 
C2 C1 B1 O13 100.4(3) . . . . ? 
C6 C1 B1 O13 -78.0(3) . . . . ? 
C2 C1 B1 O12 -20.8(3) . . . . ? 
C6 C1 B1 O12 160.7(2) . . . . ? 
C2 C1 B1 O11 -142.9(3) . . . . ? 
C6 C1 B1 O11 38.7(4) . . . . ? 
O23 Na O25 Na -26.2(9) . . . 3_465 ? 
O25 Na O25 Na -92.58(19) 3_565 . . 3_465 ? 
O21 Na O25 Na 105.05(15) . . . 3_465 ? 
O22 Na O25 Na -170.90(16) . . . 3_465 ? 
O24 Na O25 Na 15.11(15) . . . 3_465 ? 
 
_diffrn_measured_fraction_theta_max    0.999 
_diffrn_reflns_theta_full              24.96 
_diffrn_measured_fraction_theta_full   0.999 
_refine_diff_density_max    0.171 
_refine_diff_density_min   -0.207 
_refine_diff_density_rms    0.046 
